# Supplementary material for: One pot synthesis of gold hollow nanospheres with efficient and reusable catalysis
Source: Royal Society of Chemistry journal article supplement (doi:10.1039/c5ra11029g), 2015-01-01
Supplement: c5ra11029g1.pdf [file c5ra11029g1.pdf]

## Electronic Supplementary Information

# One pot synthesis of gold hollow nanospheres with efficient and reusable catalysis

Qingdong Xia,<sup>a</sup> Dongyue Su,<sup>a</sup> Xin Yang,<sup>a</sup> Fang Chai,<sup>a,b\*</sup> Chungang Wang<sup>b,\*</sup> and Jingjie Jiang<sup>a,\*</sup>

<sup>a</sup> Key Laboratory for Photonic and Electronic Bandgap Materials, Ministry of Education, Harbin Normal University, Harbin 150025, P. R. China. E-mail: fangchai@gmail.com, jiangjingjie80@163.com

<sup>b</sup> Faculty of Chemistry, Northeast Normal University, Changchun, 130024, P.R. China. E-mail: wangcg925@nenu.edu.cn

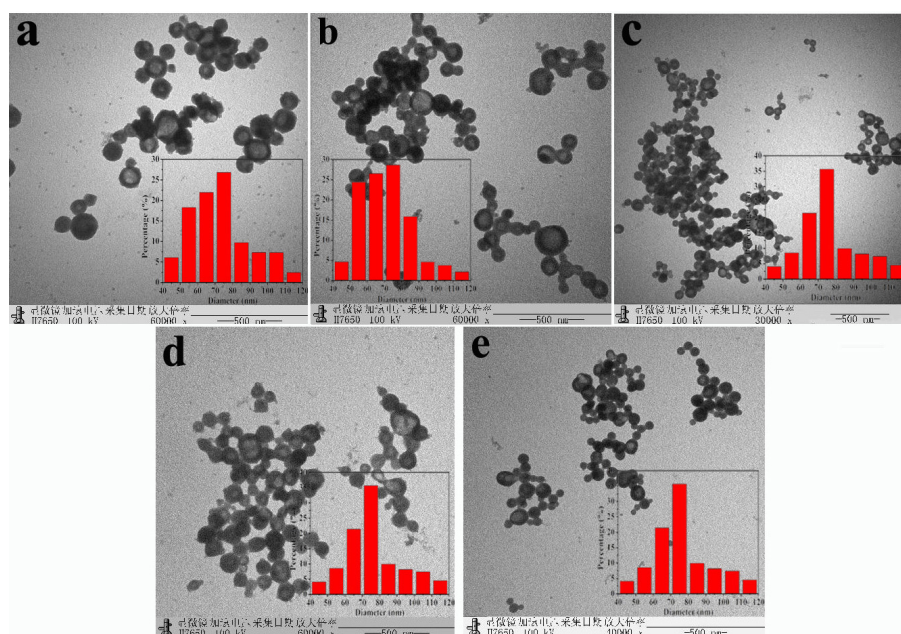

Fig. S1 TEM images of GHNSs at different reaction time for (a) 1 min, (b) 5 min, (c) 30 min, (d) 1 h, (e) 2 h, and corresponding size distribution histogram of GHNSs.

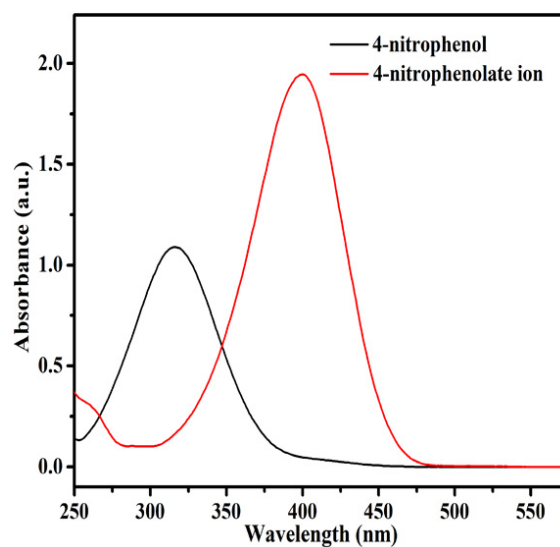

Fig. S2 The UV-vis characteristic peaks of freshly prepared 4-nitrophenol and 4-nitrophenolate ion aqueous solution at 317 and 400 nm, respectively.

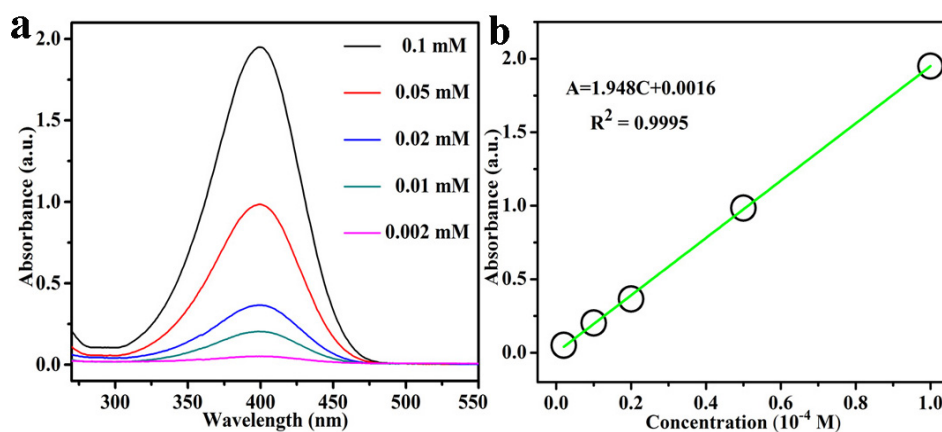

Fig. S3 (a) Absorption spectra of aqueous mixture solutions of 4-NP and NaBH<sub>4</sub> at different concentrations of 4-NP. (b) Plot of the peak absorbance against the concentration of 4-NP.

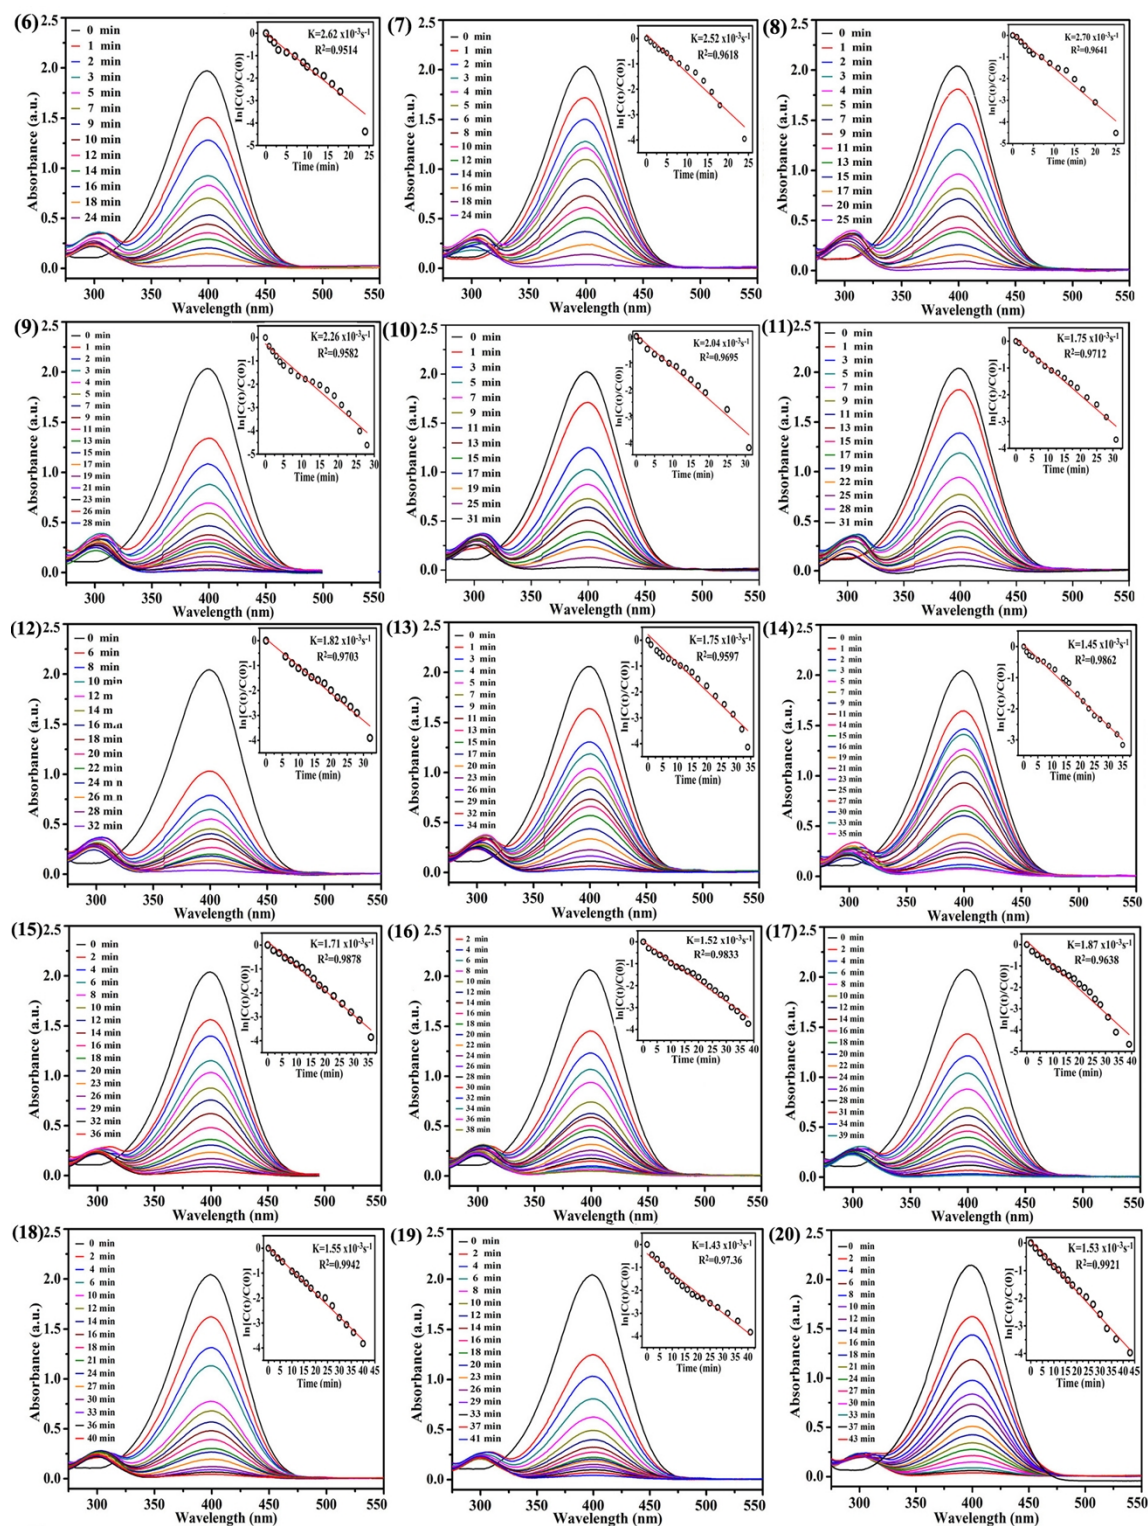

Fig. S4 the UV-vis spectra and kinetic rate of reduction of 4-NP by  $\text{NaBH}_4$  under the catalysis of GHNSs for 6-20 times.

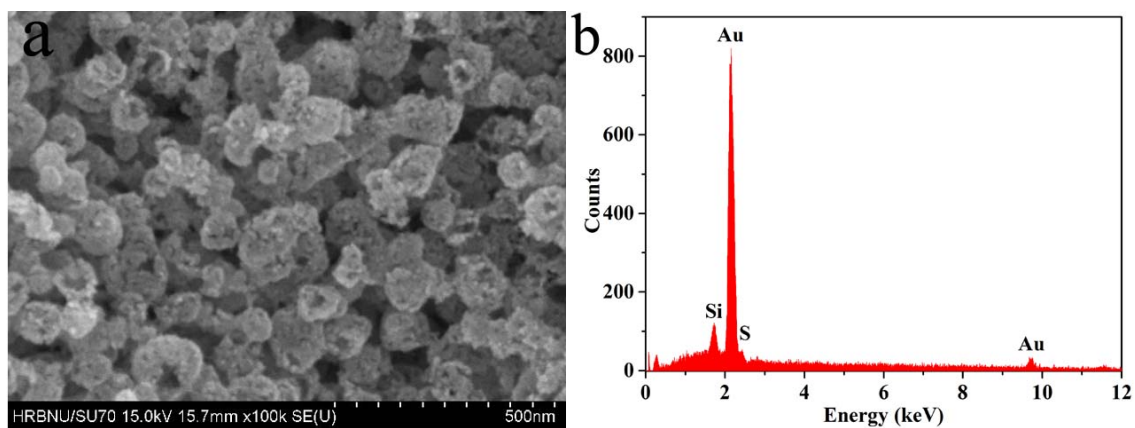

Fig. S5 The SEM (a) and EDX (b) of the GHNSs as catalyst after reused 5 times.

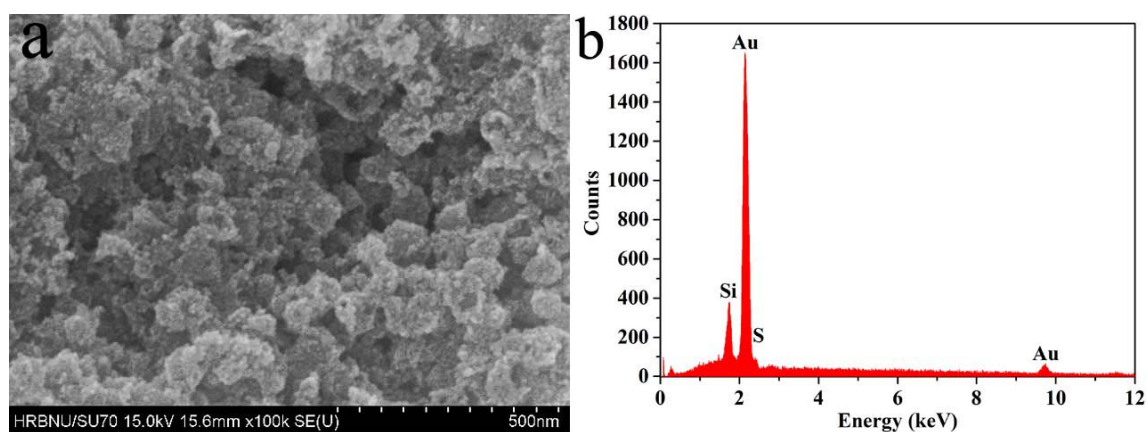

Fig. S6 The SEM (a) and EDX (b) of the GHNSs as catalyst after reused 10 times.

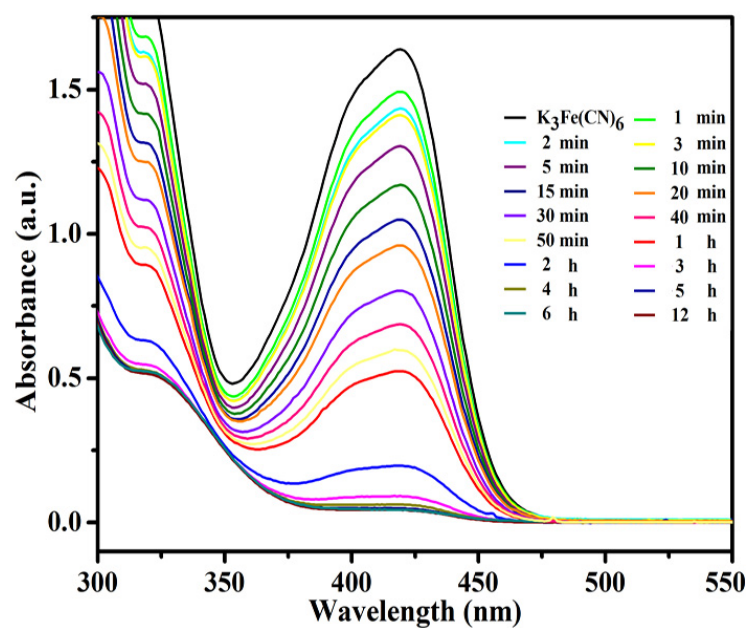

Fig. S7 UV-vis spectra of the reduction of  $\text{K}_3\text{Fe}(\text{CN})_6$  solution upon the addition of  $\text{NaBH}_4$  recorded at different times from 1 min to 12 h at  $25^\circ\text{C}$ ,  $[\text{Fe}(\text{CN})_6^{3-}] = 3 \times 10^{-3} \text{ M}$ ,  $[\text{BH}_4^-] = 0.04 \text{ M}$  in the absence of catalyst, GHNSs.
